# Supplementary material for: Quantitative modeling of human liver reveals dysregulation of glycosphingolipid pathways in nonalcoholic fatty liver disease
Source: PubMed Central journal article supplement (PMC9440293; doi:10.1016/j.isci.2022.104949), 2022-08-15
Supplement: mmc1.pdf [file mmc1.pdf]

**Supplemental information**

**Quantitative modeling of human liver reveals  
dysregulation of glycosphingolipid pathways in  
nonalcoholic fatty liver disease**

**Partho Sen, Olivier Govaere, Tim Sinioja, Aidan McGlinchey, Dawei Geng, Vlad Ratzu, Elisabetta Bugianesi, Jörn M. Schattenberg, Antonio Vidal-Puig, Michael Allison, Simon Cockell, Ann K. Daly, Tuulia Hyötyläinen, Quentin M. Anstee, and Matej Orešić**

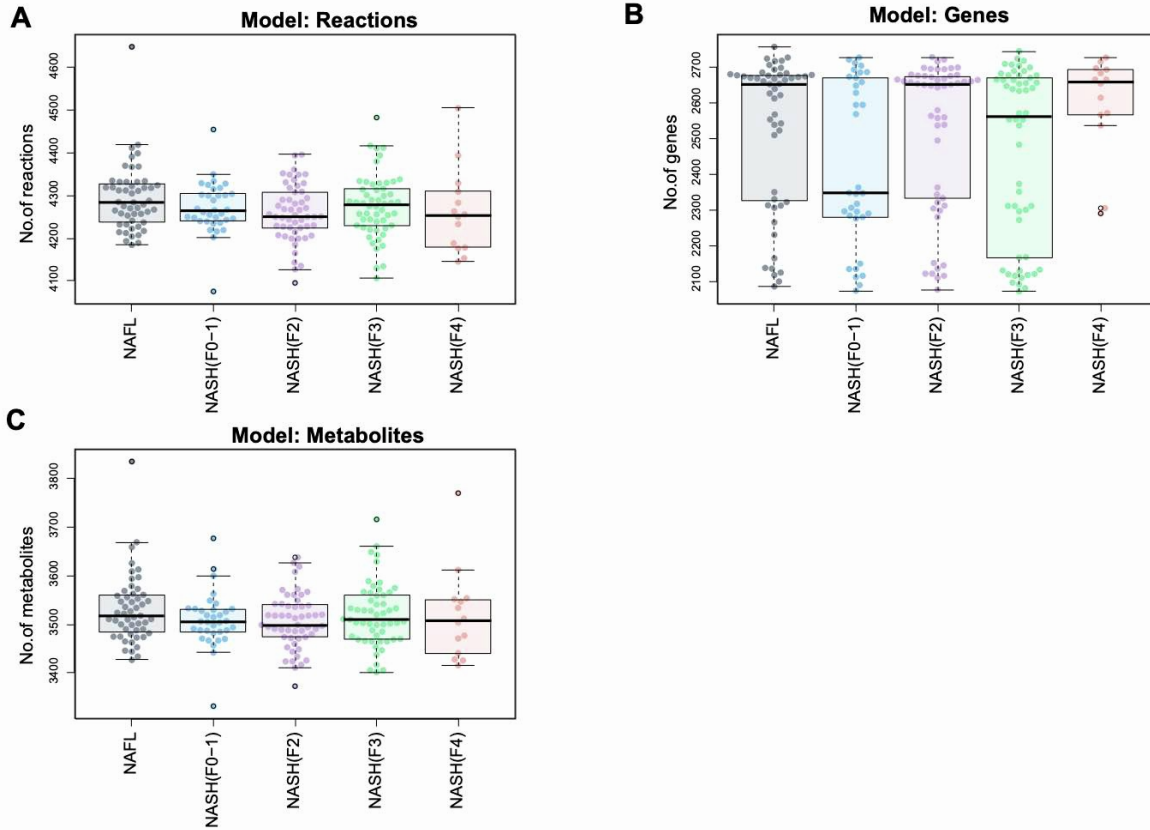

**Figure S1. Personalized genome-scale metabolic models of human hepatocytes in NAFLD.**

Boxplots showing distribution of number of reactions (**A**), genes (**B**) and metabolites (**C**) (marked by dots) contained in the genome-scale metabolic models (GEMs) of human hepatocytes developed for (n=206) subjects and contextualized for various stages of NAFLD using transcriptomics data. Related to **Figure 1**.

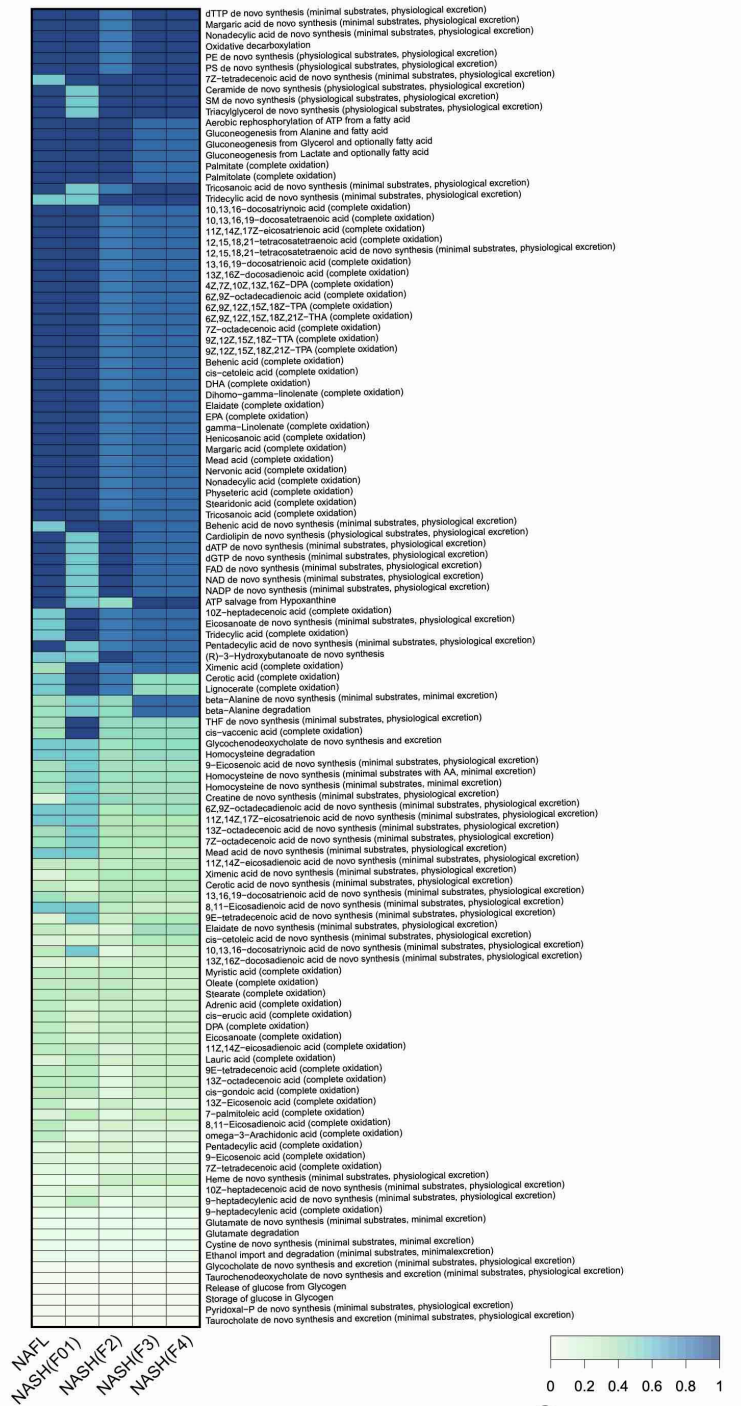

**Figure S2. Metabolic tasks carried out by the NAFLD stage-specific personalized GEMs.**

[0-1] denotes low to high occurrence scores (OS). OS acquired by a GEM is based on its capability ('Yes' or 'No') to perform the assigned metabolic task. Related to **Figures 1 and 2**.

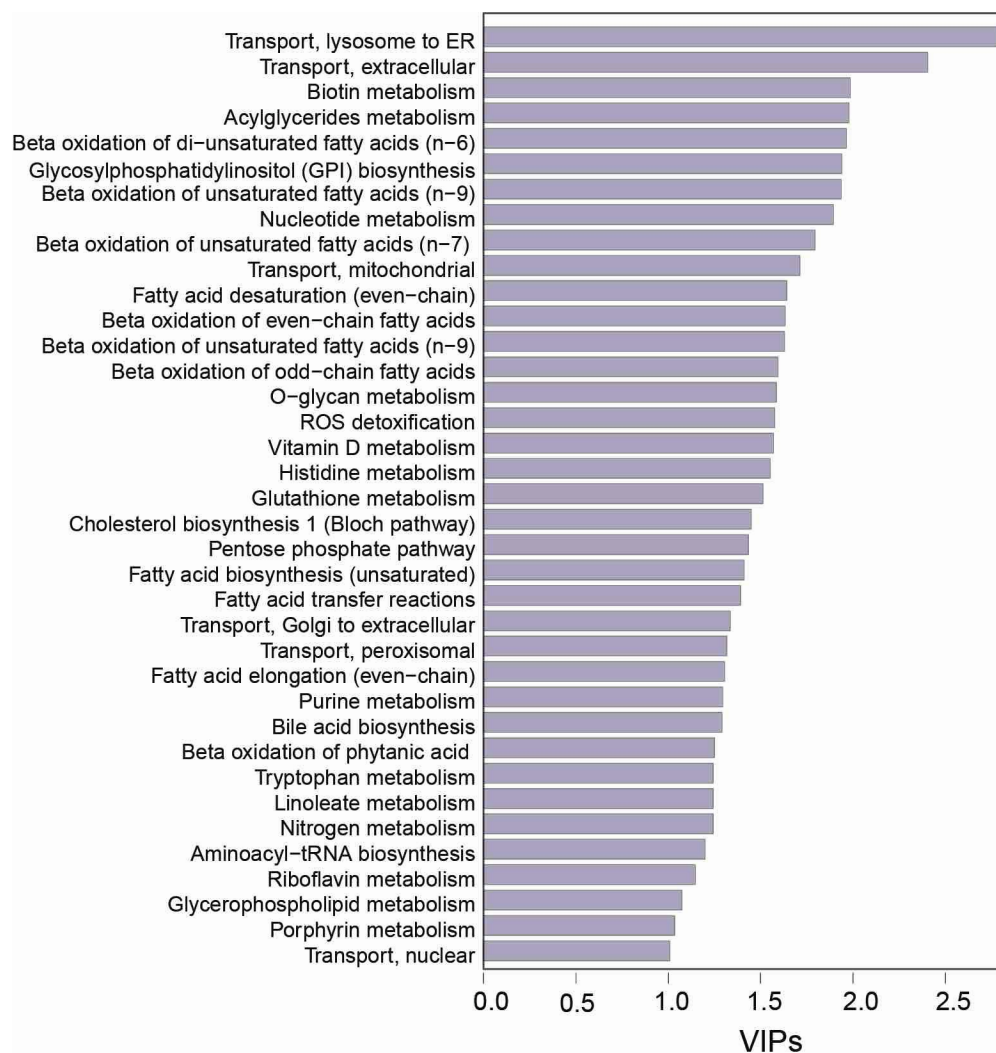

**Figure S3. Metabolic pathways/subsystems with (PLS-DA, VIP score >1). Related to Figure 2.**



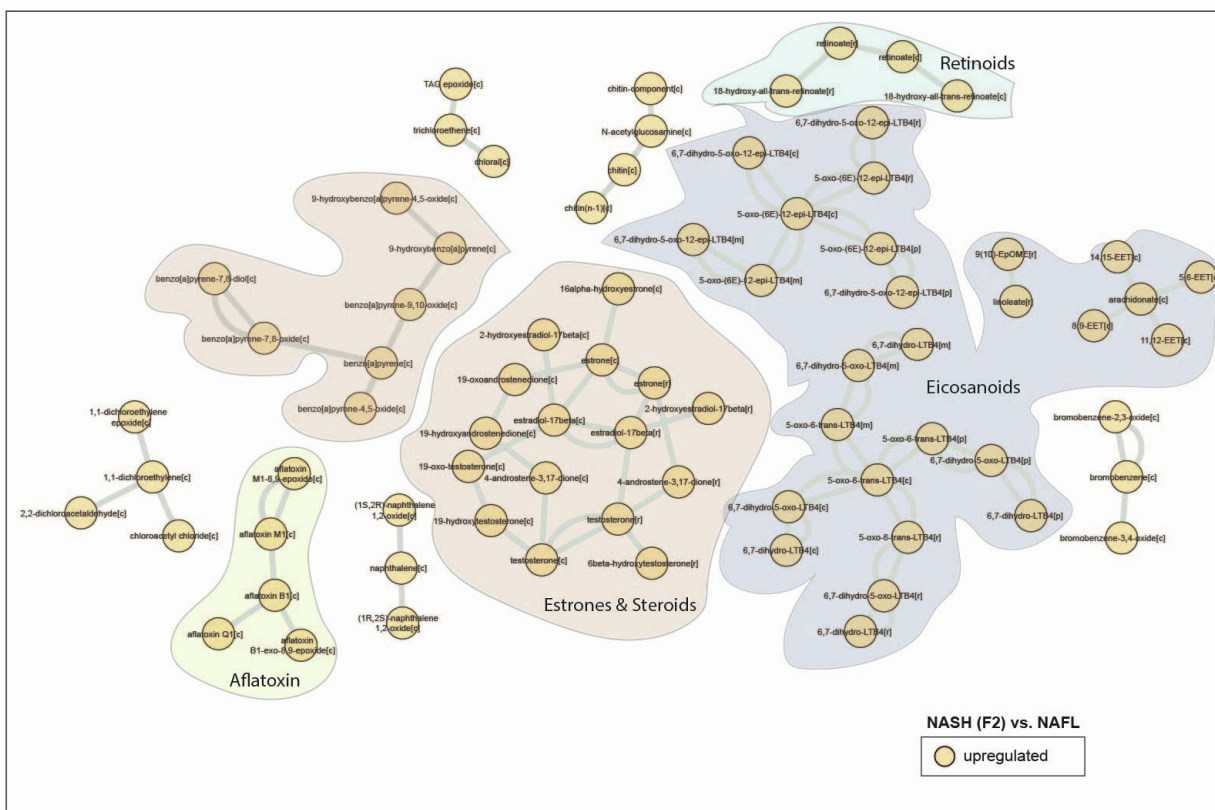

**Figure S4. A metabolic-centric view of reporter metabolite (RM) modules that were significantly altered between NASH F2 vs. NAFL.**

Orange color denotes upregulated ( $p < 0.05$  adjusted for FDR). Each node represents a 'RM' and single or double lines represent reversible or irreversible metabolic reactions respectively. RMs that belong to a particular chemical class are color coded. Related to **Figure 3**.

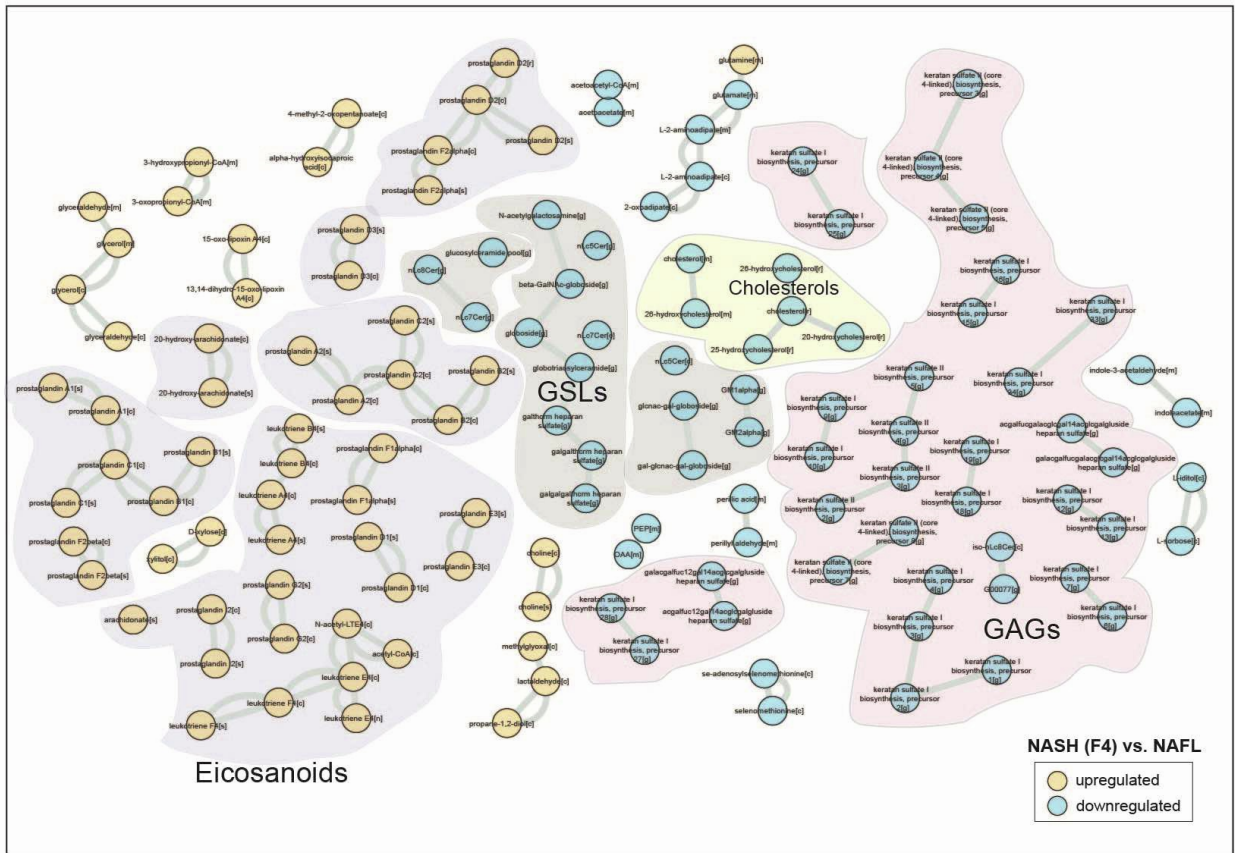

**Figure S5. A metabolic-centric view of reporter metabolite (RM) modules that were significantly altered between NASH F4 vs. NAFL.**

Orange and blue color denotes up- and downregulated ( $p < 0.05$  adjusted for FDR) respectively. Each node represents a 'RM' and single or double lines represent reversible or irreversible metabolic reactions respectively. RMs that belong to a particular chemical class are color coded. Related to **Figure 3**.

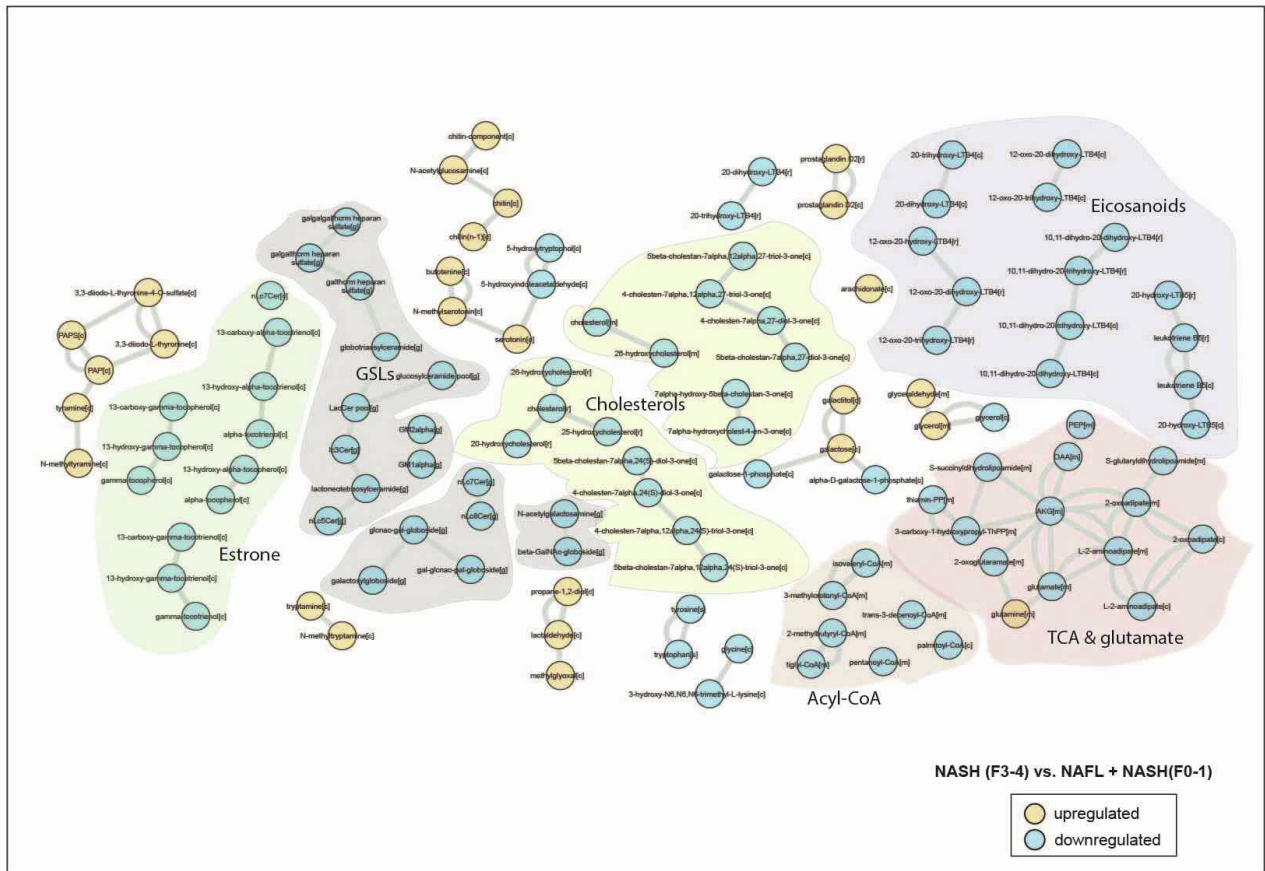

**Figure S6. A metabolic-centric view of reporter metabolite (RM) modules that were significantly altered between ‘advanced’ fibrosis vs. ‘minimum’ disease.**

Orange and blue color denotes up and downregulated ( $p < 0.05$  adjusted for FDR) respectively. Each node represents a ‘RM’ and single or double lines represent reversible or irreversible metabolic reactions respectively. RMs that belong to a particular chemical class are color coded. Related to **Figure 3**.

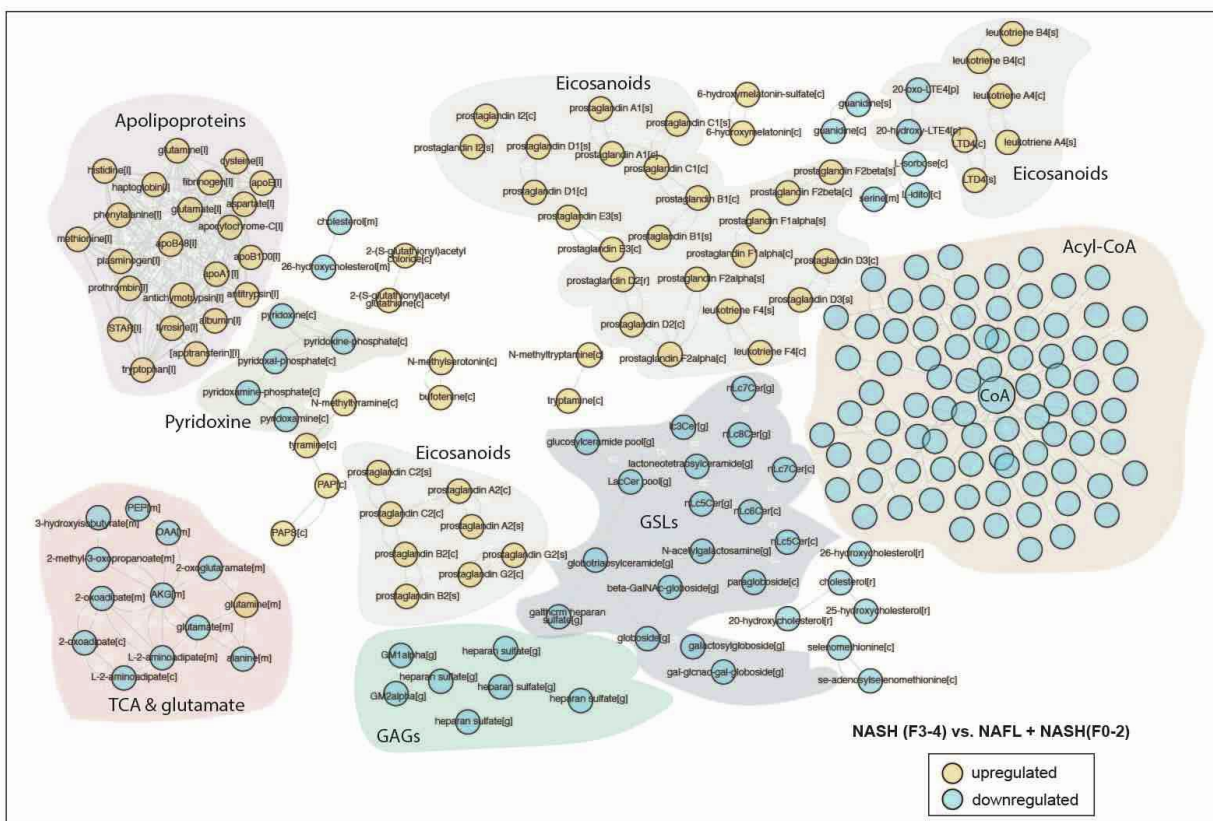

**Figure S7. A metabolic-centric view of reporter metabolite (RM) modules that were significantly altered between ‘advanced’ fibrosis vs. ‘mild disease.**

Orange and blue color denotes up and downregulated ( $p < 0.05$  adjusted for FDR) respectively. Each node represents a ‘RM’ and single or double lines represent reversible or irreversible metabolic reactions respectively. RMs that belong to a particular chemical class are color coded. Related to **Figure 3.**



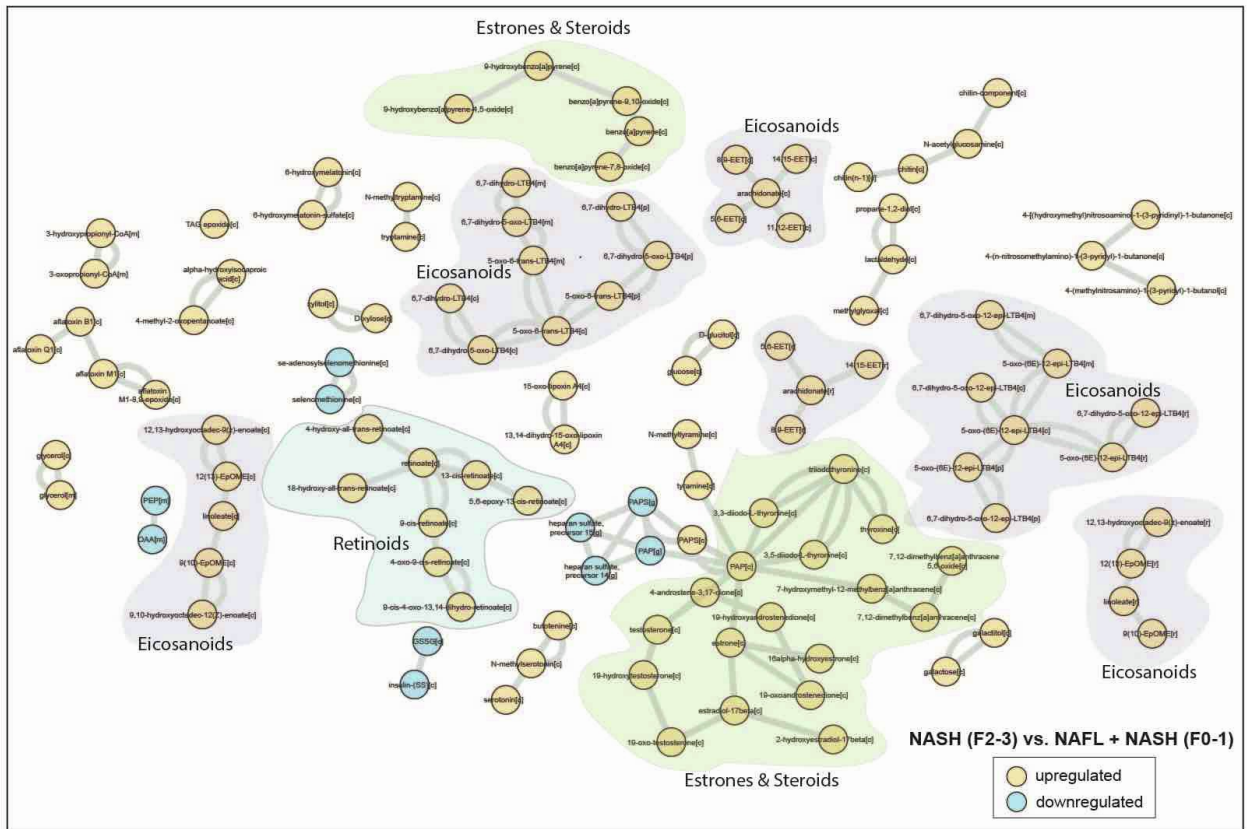

**Figure S8. A metabolic-centric view of reporter metabolite (RM) modules that were significantly altered between ‘clinically significant’ non-cirrhotic fibrosis vs. ‘minimum’ disease.**

Orange and blue color denotes up and downregulated ( $p < 0.05$  adjusted for FDR) respectively. Each node represents a ‘RM’ and single or double lines represent reversible or irreversible metabolic reactions respectively. RMs that belong to a particular chemical class are color coded. Related to **Figure 3**.

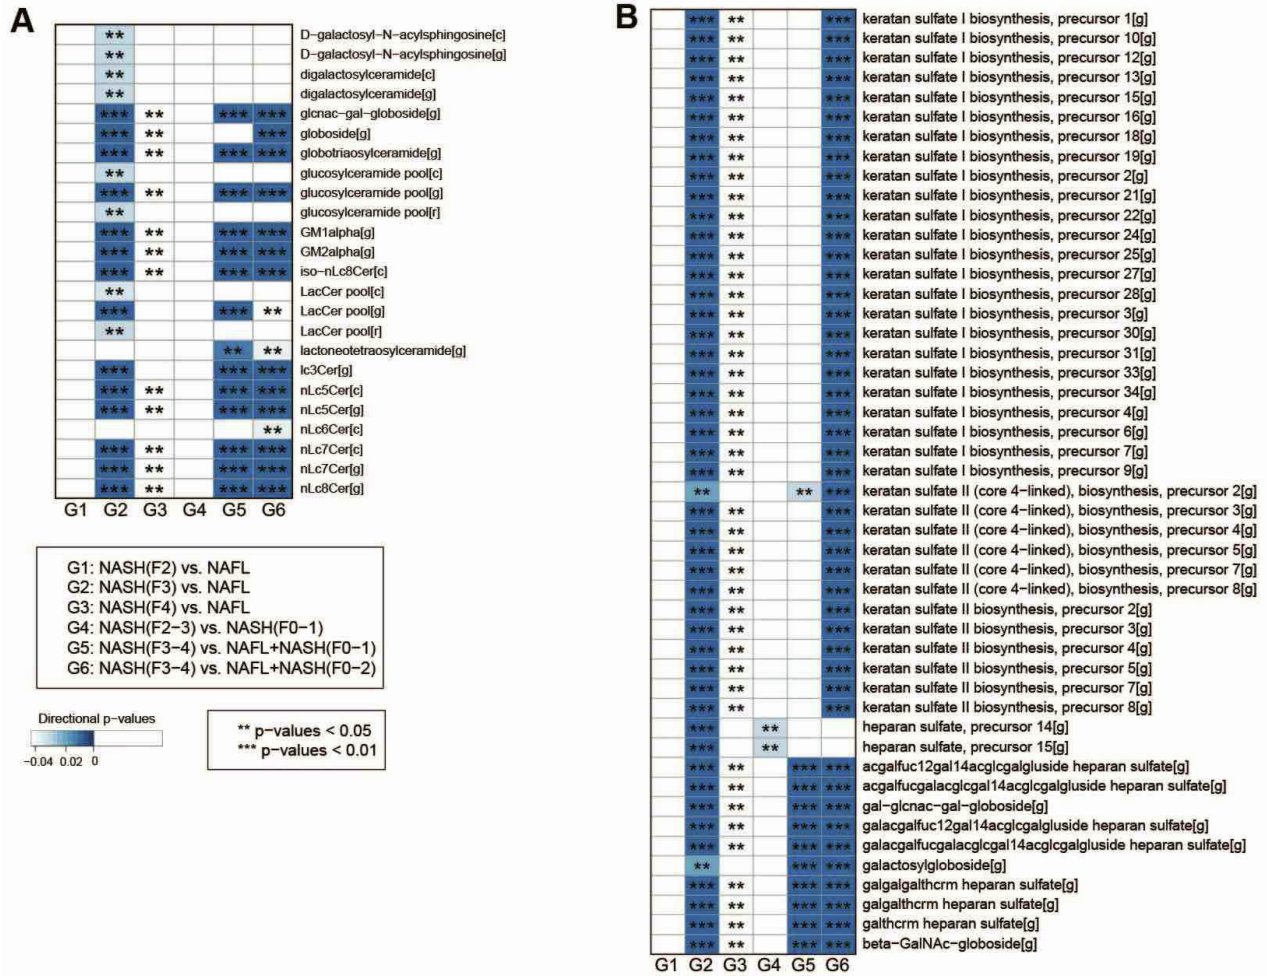

**Figure S9.** Heatmap showing RM clusters of (A) glycosphingolipids (GSLs) and (B) glycosaminoglycans (GAGs) that are significantly ( $***p < 0.01$ ,  $**p < 0.05$ , adjusted for FDR) downregulated (blue color) along the different stages NAFLD. Related to **Figure 3**.

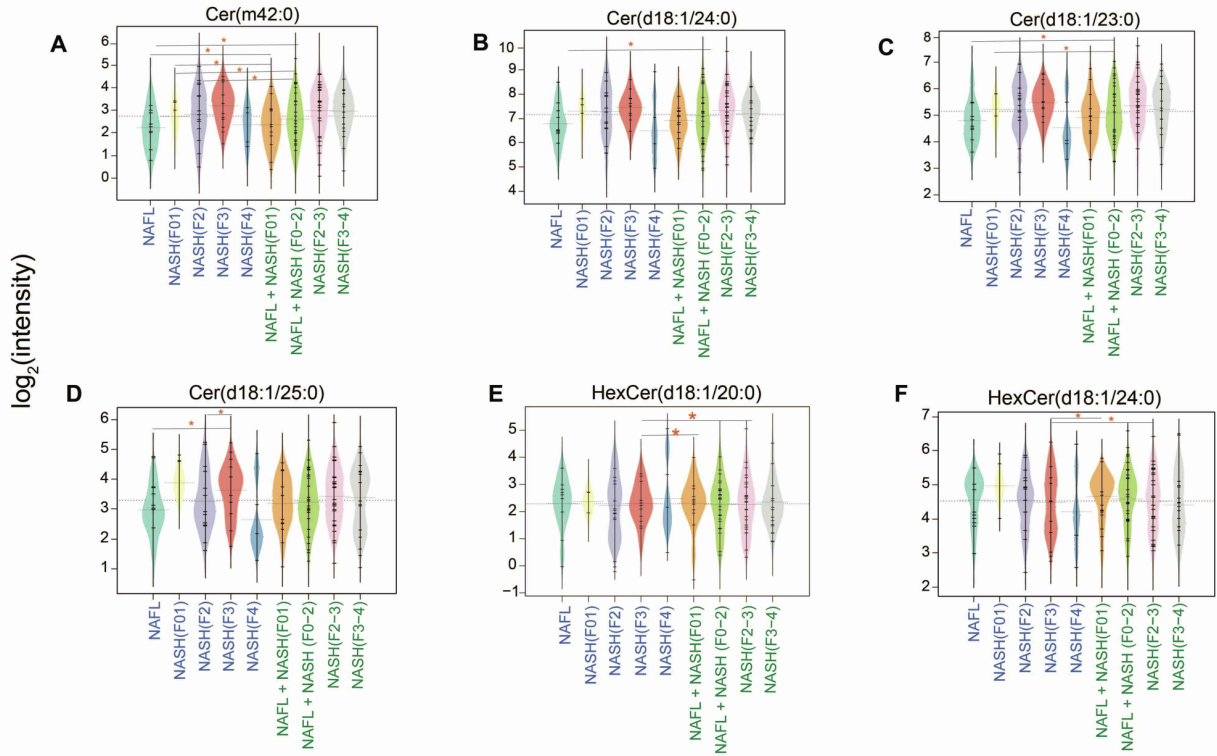

**Figure S10. Serum metabolic levels of ceramides and glycosphingolipids in the patients (n=41) at different stages of NAFLD.**

(A-F) Beanplots showing the  $\log_2$  intensities of the Cers and GSLs across different stages of NAFLD. The dotted line denotes the mean of the population, and the black dashed lines in the bean plots represent the group mean. Related to **Figure 5**.

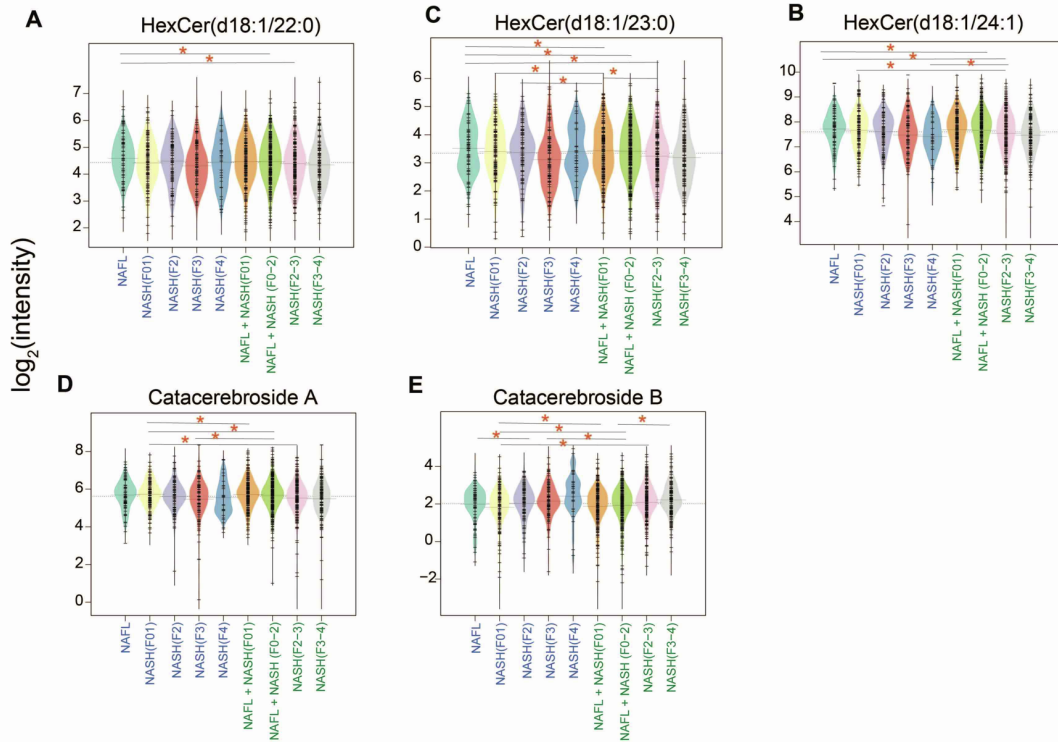

**Figure S11. Serum metabolic levels of glycosphingolipids in the patients (n=360) at different stages of NAFLD.**

(A-E) Beanplots showing the log<sub>2</sub> intensities of GSLs across different stages of NAFLD. The dotted line denotes the mean of the population, and the black dashed lines in the bean plots represent the group mean. Related to **Figure 5**.



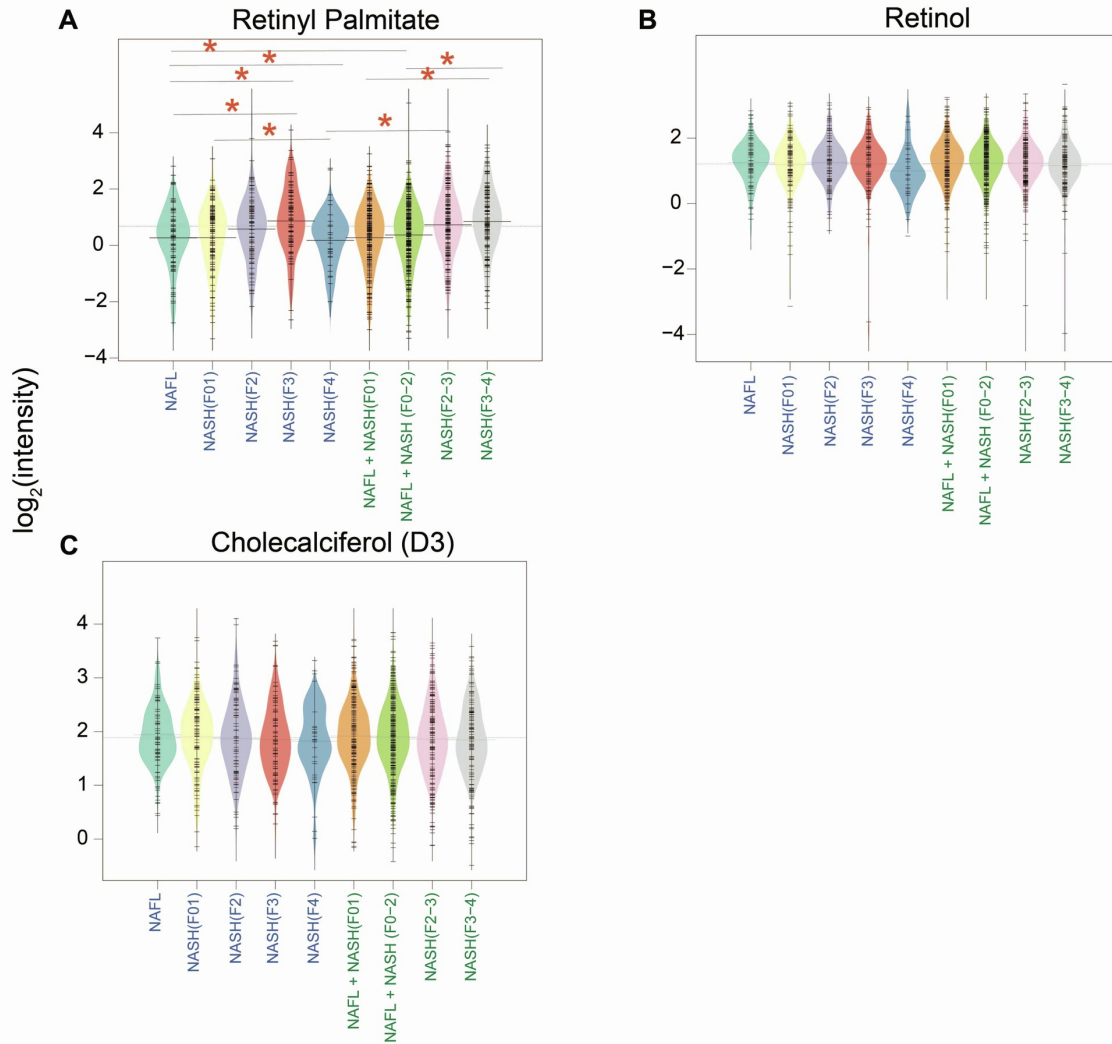

**Figure S12. Serum levels of retinoids in the patients (n=360) at different stages of NAFLD.**

(A-C) Beanplots showing the log<sub>2</sub> intensities of the retinoids across different stages of NAFLD. The dotted line denotes the mean of the population, and the black dashed lines in the bean plots represent the group mean. Related to **Figure 6**.

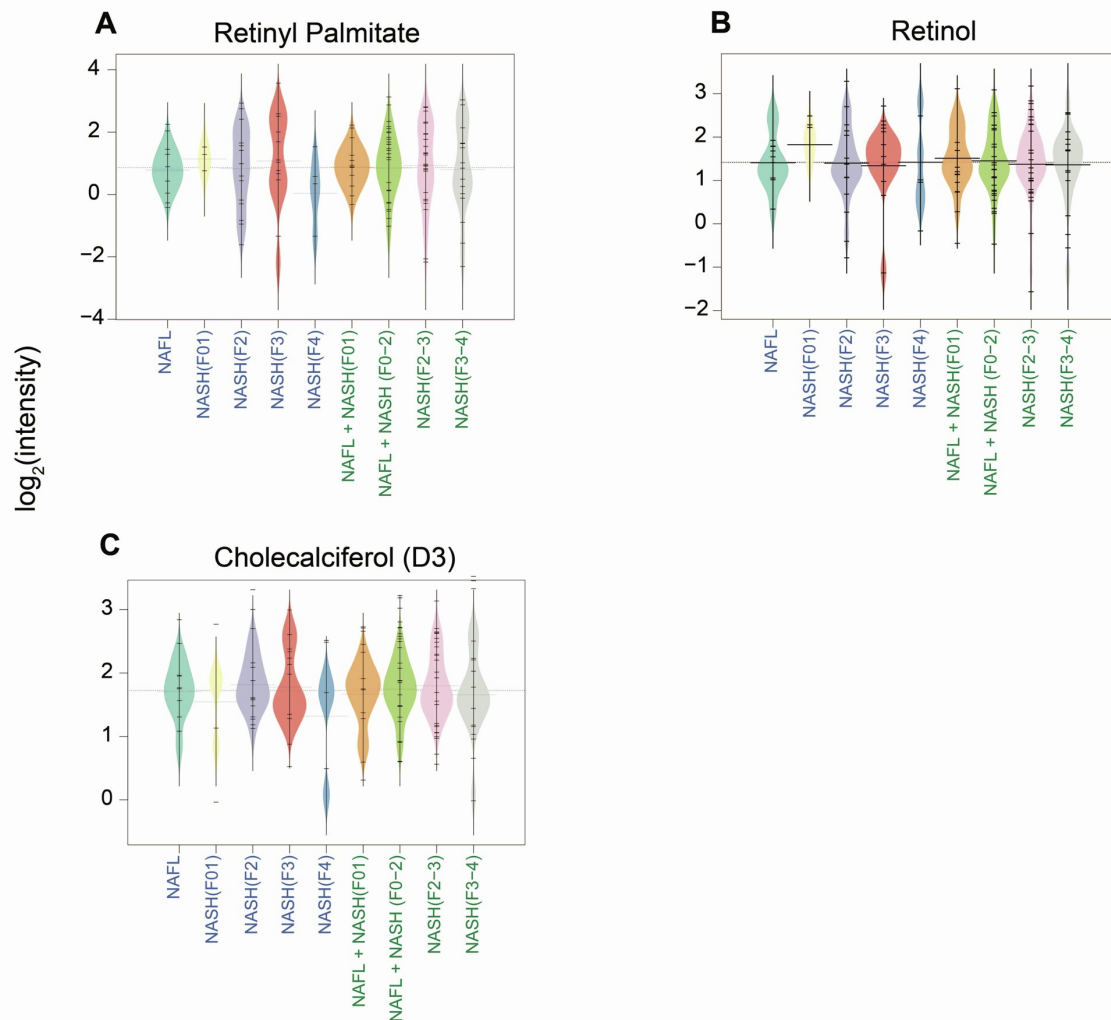

**Figure S13. Serum levels of retinoids in the patients (n=41) at different stages of NAFLD.** (A-C) Beanplots showing the log<sub>2</sub> intensities of the retinoids across different stages of NAFLD. The dotted line denotes the mean of the population, and the black dashed lines in the bean plots represent the group mean. Related to **Figure 6**.

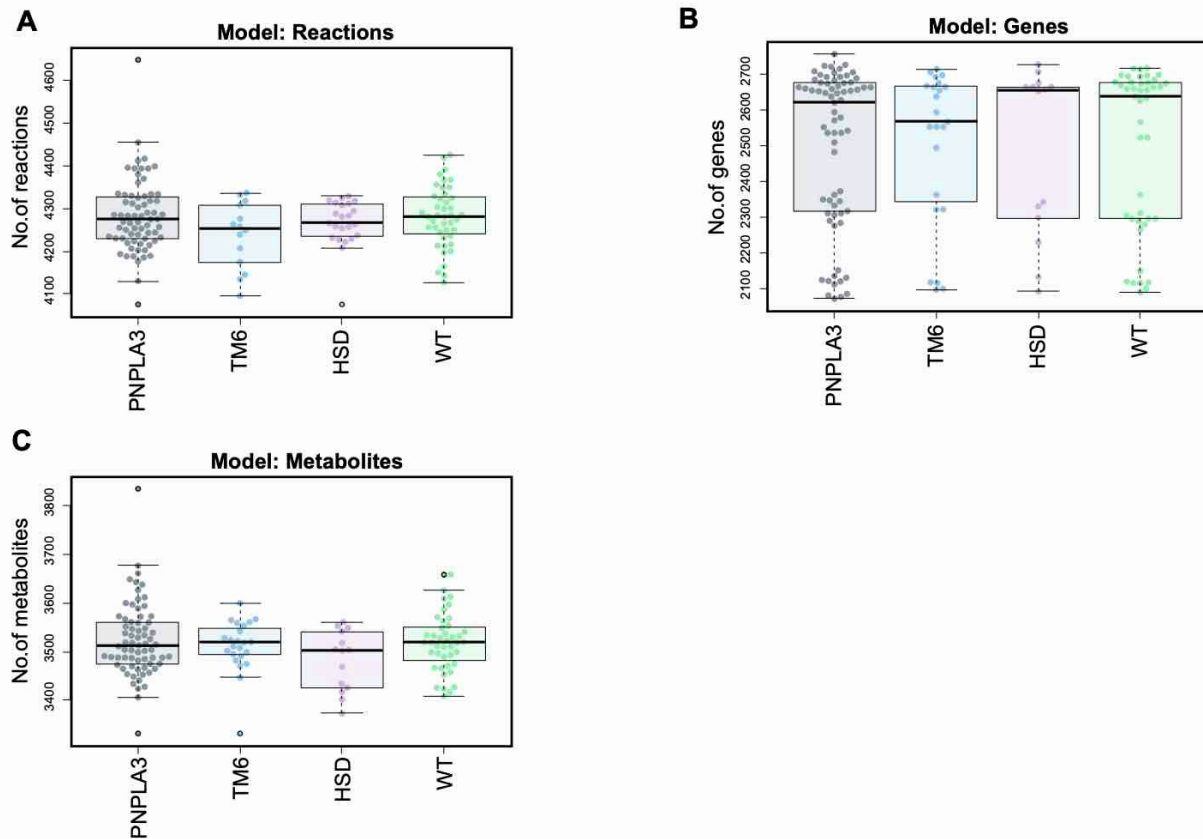

**Figure S14. Personalized genome-scale metabolic models of human hepatocytes contextualized for gene variants and WT.**

Boxplots showing distribution of number of reactions (A), genes (B) and metabolites (C) (marked by dots) contained in the genome-scale metabolic models (GEMs) of human hepatocytes developed for (n=139) subjects, and contextualized for three major genetic variants (*PNPLA3*, *TM6SF2* and *HSD17B13*) and WT; associated with risk and severity of NAFLD. ‘WT’ is a wild-type model. Related to **Figure 6**.



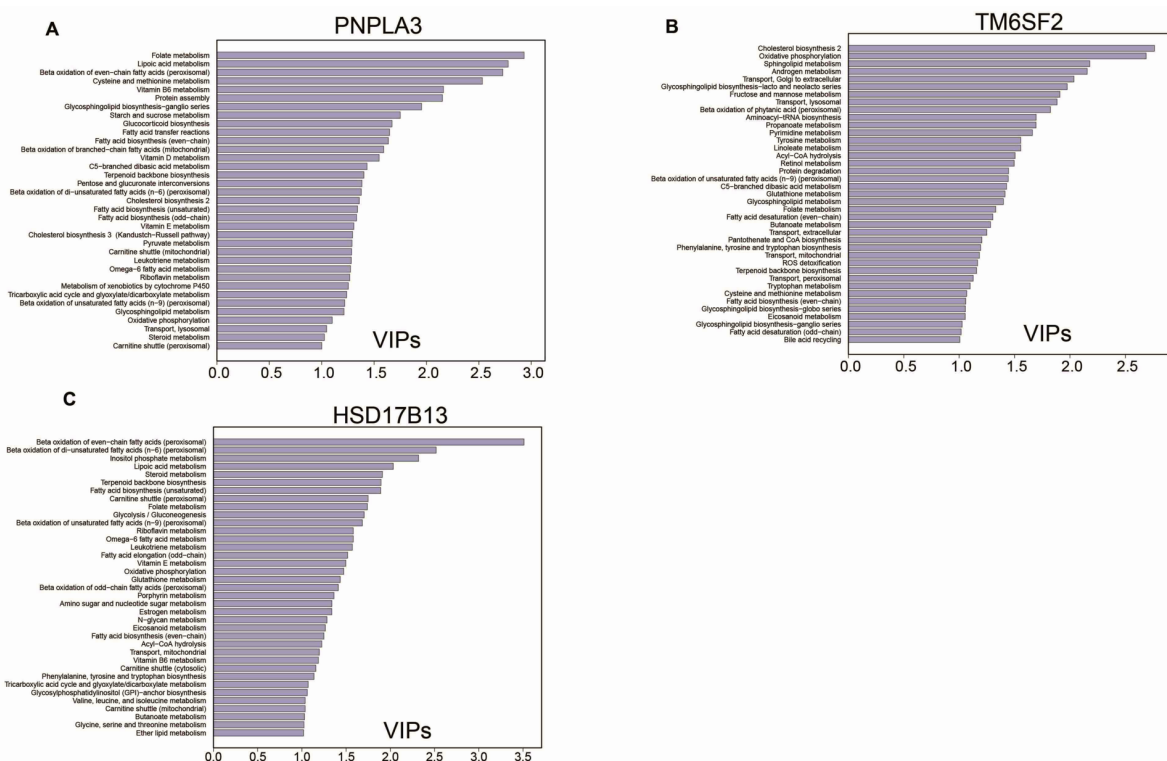

**Figure S16. Variable Importance in Projection (VIP) scores derived from PLS-DA of the metabolic subsystems/pathways differences across three major gene variants vs. WT groups. (A-C) Metabolic subsystems sorted by their (VIP scores >1) retrieved by fitting pairwise PLS-DA models for (A) *PNPLA3* (B) *TM6SF2* and (C) *HSD17B13* gene variants vs. WT. Related to Figure 6.**

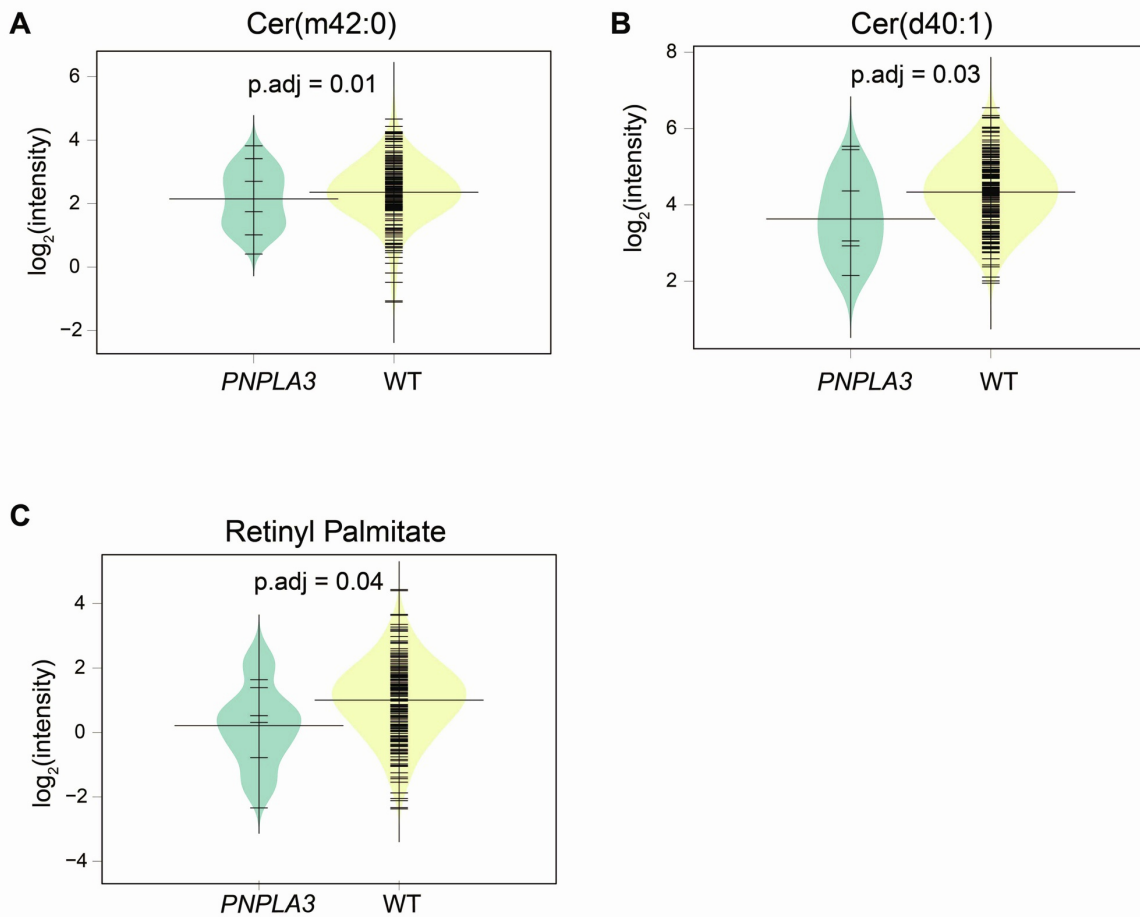

**Figure S17. Difference in the intensities of metabolites between the *PNPLA3* variant vs. WT groups. (A-C)** Beanplots showing differences in the  $\log_2$  intensities of the Cer(m42:0), Cer(d40:1) and retinyl palmitate measured in the serum samples of a patient subgroup exclusively carrying variants for *PNPLA3* (homo- and heterozygous) gene vs. WT. The dotted line denotes the mean of the population, and the black dashed lines in the bean plots represent the group mean. Statistical significance was determined by (two-sample t-test,  $p < 0.05$  adjusted for FDR, p.adj). Related to **Figure 6**.

**Table S1. Demographic characteristics of the disease groups. Related to Figures 2–4.**

| <b>Clinical features</b> | <b>NAFL</b><br>(n=51) | <b>NASH (F0-1)</b><br>(n=34) | <b>NASH (F2)</b><br>(n=53) | <b>NASH (F3)</b><br>(n=54) | <b>NASH (F4)</b><br>(n=14) |
|--------------------------|-----------------------|------------------------------|----------------------------|----------------------------|----------------------------|
| Age<br>(mean ± SD)       | 50.55 ± 13.73         | 51.32 ± 11.89                | 53.23 ± 11.69              | 57.81 ± 9.06               | 61.21 ± 8.42               |
| Sex                      |                       |                              |                            |                            |                            |
| male                     | 35                    | 23                           | 27                         | 31                         | 7                          |
| female                   | 16                    | 11                           | 26                         | 23                         | 7                          |
| BMI<br>(mean ± SD)       | 29.42 ± 4.14          | 28.44 ± 8.96                 | 31.11 ± 8.04               | 31.34 ± 6.28               | 30.01 ± 13.84              |
| T2DM                     |                       |                              |                            |                            |                            |
| no                       | 38                    | 20                           | 23                         | 12                         | 3                          |
| yes                      | 13                    | 14                           | 30                         | 41                         | 11                         |
| ALT<br>(mean ± SD)       | 50.37 ± 33.39         | 65.91 ± 33.87                | 75.66 ± 56.18              | 73.17 ± 35.72              | 65.86 ± 33.77              |
| AST<br>(mean ± SD)       | 34.43 ± 15.48         | 30.79 ± 12.34                | 48.53 ± 27.86              | 51.98 ± 26.51              | 50.29 ± 27.40              |

**Table S2. Demographic characteristics of the Type 2 Diabetes (T2DM) vs no T2DM groups.**  
 Related to **Figures 2–4.**

|                                       |        | <b>T2DM yes</b><br>(n=110) | <b>T2DM no</b><br>(n=96) |
|---------------------------------------|--------|----------------------------|--------------------------|
| Sex                                   | male   | 61                         | 62                       |
|                                       | female | 49                         | 34                       |
| Age                                   |        | 57.04 +/- 10.21            | 50.51 +/- 12.7           |
| BMI                                   |        | 31.58 +/- 6.44             | 30.41 +/- 5.13           |
| ALT                                   |        | 63.21 +/- 35.08            | 71.61 +/- 47.81          |
| AST                                   |        | 45.70 +/- 22.78            | 43.47 +/- 23.49          |
| HBA1C                                 |        | 56.26 +/- 14.92            | 38.69 +/- 5.90           |
| Anti-hyperglycemic drugs              | no     | 26                         | 87                       |
|                                       | yes    | 74                         | 2                        |
|                                       | --     | 10                         | 7                        |
| Grade of Steatosis                    | 0      | 0                          | 0                        |
|                                       | 1      | 25                         | 35                       |
|                                       | 2      | 49                         | 24                       |
|                                       | 3      | 36                         | 37                       |
| Hepatocyte Ballooning                 | 0      | 14                         | 38                       |
|                                       | 1      | 57                         | 41                       |
|                                       | 2      | 39                         | 17                       |
| Kleiner Lobular inflammation          | 0      | 7                          | 9                        |
|                                       | 1      | 47                         | 48                       |
|                                       | 2      | 44                         | 36                       |
|                                       | 3      | 12                         | 3                        |
| SAF Lobular inflammation              | 0      | 7                          | 9                        |
|                                       | 1      | 72                         | 68                       |
|                                       | 2      | 62                         | 19                       |
| NAS>=4                                | yes    | 87                         | 63                       |
| SAF activity >=2                      | yes    | 95                         | 59                       |
| Stage Kleiner (5-tier staging system) | 0      | 11                         | 27                       |
|                                       | 1      | 16                         | 31                       |
|                                       | 2      | 30                         | 23                       |
|                                       | 3      | 42                         | 12                       |
|                                       | 4      | 11                         | 3                        |



**Table S3.** Selection of individuals carrying variants for *PNPLA3*, *TM6SF2* and *HSD17B13* genes associated with risk and severity of NAFLD. Related to **Figure 6**.

| Gene variants                                                                                                    | RNA-seq cohort<br>(Govaere et al., 2020) |                                                                                                                                                                                             |
|------------------------------------------------------------------------------------------------------------------|------------------------------------------|---------------------------------------------------------------------------------------------------------------------------------------------------------------------------------------------|
|                                                                                                                  | (Individuals)                            | No. of participants                                                                                                                                                                         |
| <i>PNPLA3</i> rs738409<br>(CC/GC/GG)                                                                             | 206                                      | <b>69</b> individuals exclusively exhibiting carriers of <i>PNPLA3</i> rs738409 (GG, GC) and homozygous / wild types for <i>TM6SF2</i> rs58542926 (CC) and <i>HSD17B13</i> rs72613567 (--). |
| <i>PNPLA3</i> rs738409 (CC)                                                                                      | 75                                       |                                                                                                                                                                                             |
| <i>PNPLA3</i> rs738409 (GG)                                                                                      | 42                                       |                                                                                                                                                                                             |
| <i>PNPLA3</i> rs738409 (GC)                                                                                      | 89                                       |                                                                                                                                                                                             |
| <i>TM6SF2</i> rs58542926<br>(CC/CT/TT)                                                                           | 206                                      | <b>13</b> individuals exclusively exhibiting carriers of <i>TM6SF2</i> rs58542926 (CT, TT) and homozygous / wild types for <i>PNPLA3</i> rs738409 (CC) and <i>HSD17B13</i> rs72613567 (--). |
| <i>TM6SF2</i> rs58542926 (CC)                                                                                    | 156                                      |                                                                                                                                                                                             |
| <i>TM6SF2</i> rs58542926 (CT)                                                                                    | 2                                        |                                                                                                                                                                                             |
| <i>TM6SF2</i> rs58542926 (TT)                                                                                    | 48                                       |                                                                                                                                                                                             |
| <i>HSD17B13</i> rs72613567<br>(--/-T/TT)                                                                         | 188                                      | <b>21</b> individuals exclusively exhibiting carriers of <i>HSD17B13</i> rs72613567 (-T, TT) and homozygous / wild types for <i>TM6SF2</i> rs58542926 (CC) and <i>PNPLA3</i> rs738409 (CC). |
| <i>HSD17B13</i> rs72613567 (--)                                                                                  | 120                                      |                                                                                                                                                                                             |
| <i>HSD17B13</i> rs72613567<br>(TT)                                                                               | 7                                        |                                                                                                                                                                                             |
| <i>HSD17B13</i> rs738409 (-T)                                                                                    | 61                                       |                                                                                                                                                                                             |
| Wild types, WTs ( <i>PNPLA3</i> rs738409 (CC) + <i>TM6SF2</i> rs58542926 (CC) + <i>HSD17B13</i> rs72613567 (--)) | --                                       | <b>36</b> individual wild types for <i>PNPLA3</i> rs738409, <i>TM6SF2</i> rs58542926 and <i>HSD17B13</i> rs72613567                                                                         |

**Table S4.** Assignment of (n=206) individuals exclusively carrying variants (homo- and heterozygous) for *PNPLA3*, *TM6SF2* and *HSD17B13* to their respective NAFLD groups. Related to **Figure 6**.

| <b>Gene variants</b> | <b>NAFL</b><br>(n) | <b>NASH (F0-1)</b><br>(n) | <b>NASH (F2)</b><br>(n) | <b>NASH (F3)</b><br>(n) | <b>NASH (F4)</b><br>(n) |
|----------------------|--------------------|---------------------------|-------------------------|-------------------------|-------------------------|
| <i>PNPLA3</i>        | 17                 | 14                        | 16                      | 17                      | 5                       |
| <i>TM6SF2</i>        | 2                  | 1                         | 5                       | 3                       | 2                       |
| <i>HSD17B13</i>      | 8                  | 4                         | 2                       | 7                       | 0                       |
| WT                   | 11                 | 5                         | 9                       | 8                       | 3                       |
